# Supplementary material
Source: publisher figshare collection journal article supplement (https://acs.figshare.com/ndownloader/files/14243774)
Supplement: Supplementary file 1 [file 14243774]

## **Cover Sheet of the supporting information**

**Authors:** Jiaying Cui, Nengwu Zhu, Deliang Luo, Yao Li, Pingxiao Wu, Zhi Dang, Xuan Hu

**Title:** The role of oxalic acid in the leaching system for recovering indium from waste liquid crystal display panels

**Supporting Information Content:**

3 Pages

1 Table

## Supporting Information

### **The role of oxalic acid in the leaching system for recovering indium from waste liquid crystal display panels**

*Jiaying Cui,<sup>†,‡</sup> Nengwu Zhu,<sup>\*,†,§,||</sup> Deliang Luo,<sup>†</sup> Yao Li,<sup>†</sup> Pingxiao Wu,<sup>†,§,||</sup> Zhi Dang,<sup>†,§</sup> Xuan Hu<sup>⊥</sup>*

<sup>†</sup>School of Environment and Energy, South China University of Technology, Guangzhou Higher Education Mega Center, Guangzhou 510006, PR China

<sup>‡</sup>Department of Mechanical Engineering & Materials Science, Duke University, 101 Science Dr, Durham, North Carolina 27708, United States

<sup>§</sup>The Key Lab of Pollution Control and Ecosystem Restoration in Industry Clusters, Ministry of Education, Guangzhou Higher Education Mega Center, Guangzhou 510006, PR China

<sup>||</sup>Guangdong Environmental Protection Key Laboratory of Solid Waste Treatment and Recycling, Guangzhou Higher Education Mega Center, Guangzhou 510006, PR China

<sup>⊥</sup>Department of Civil & Environmental Engineering, Rutgers University, 96 Frelinghuysen Road, Piscataway, New Jersey 08854, United States

\*Correspondence author. Address: School of Environment and Energy, South China University of Technology, Guangzhou Higher Education Mega Center, Guangzhou 510006 P.R. China. Tel./fax: +86 20 3938 0522.

E-mail address: [nwzhu@scut.edu.cn](mailto:nwzhu@scut.edu.cn) (N. Zhu).

---

Table S1 Indium leaching rates at different temperatures

| Temperature (°C) | $k$ (mM/min) | $R^2$  |
|------------------|--------------|--------|
| 30               | 0.001272449  | 0.9902 |
| 40               | 0.002795729  | 0.9927 |
| 50               | 0.004055984  | 0.9664 |
| 60               | 0.005407689  | 0.9928 |
| 70               | 0.013386403  | 1.0000 |
| 80               | 0.015235416  | 1.0000 |

---
